# Supplementary material for: Monovalent indium in a sulfur-rich coordination environment: synthesis, structure and reactivity of tris(2-mercapto-1-tert-butylimidazolyl)hydroborato indium, [TmBut]In
Source: Royal Society of Chemistry journal article supplement (doi:10.1039/b803037e), 2008-01-01
Supplement: b803037e.pdf [file b803037e.pdf]

## SUPPORTING INFORMATION

**Monovalent Indium in a Sulfur-Rich Coordination Environment:  
Synthesis, Structure and Reactivity of  
*Tris*(2-mercapto-1-t-butylimidazolyl)hydroborato Indium, [Tm<sup>Bu<sup>t</sup></sup>]In**

Kevin Yurkerwich, Daniela Buccella, Jonathan G. Melnick and Gerard Parkin,\*

*Department of Chemistry,  
Columbia University,  
New York, New York 10027, USA.  
E-mail: parkin@columbia.edu*

*Received xxxx xx, 2008.*

## EXPERIMENTAL SECTION

### General Considerations

All manipulations were performed using a combination of glovebox, high vacuum, and Schlenk techniques under a nitrogen or argon atmosphere unless otherwise specified.<sup>1</sup> Solvents were purified and degassed by standard procedures. <sup>1</sup>H NMR spectra were measured on Bruker 300 DRX and Bruker 400 DRX spectrometers. <sup>1</sup>H NMR chemical shifts are reported in ppm relative to SiMe<sub>4</sub> ( $\delta = 0$ ) and were referenced internally with respect to the protio solvent impurity ( $\delta$  7.16 for C<sub>6</sub>D<sub>5</sub>H; 7.26 for CHCl<sub>3</sub> and 1.94 for CHD<sub>2</sub>CN).<sup>2</sup> <sup>13</sup>C NMR spectra are reported in ppm relative to SiMe<sub>4</sub> ( $\delta = 0$ ) and were referenced internally with respect to the solvent ( $\delta$  128.06 for C<sub>6</sub>D<sub>6</sub><sup>2</sup> and 67.4 for the downfield signal of THF-*d*<sub>8</sub><sup>3</sup>). <sup>19</sup>F NMR spectra are reported in ppm relative to CFC<sub>3</sub> ( $\delta = 0$ ) and were referenced using external PhCF<sub>3</sub> in CDCl<sub>3</sub> ( $\delta = -63.7$ ).<sup>4</sup> Coupling constants are given in hertz. Infrared spectra were recorded on Nicolet Avatar 370 DTGS spectrometer and are reported in cm<sup>-1</sup>. Mass spectra were obtained on a Micromass Quadrupole-Time-of-Flight mass spectrometer using fast atom bombardment (FAB). [Tm<sup>But</sup>]K<sup>5</sup> and [Tm<sup>But</sup>]Tl<sup>6</sup> were prepared by the literature methods. InCl (Strem), InCl<sub>3</sub> (Aldrich) and InI<sub>3</sub> (Ventron Division of Morton Thiokol) were obtained commercially and used as received.

### Synthesis of [Tm<sup>But</sup>]In

A mixture of InCl (340 mg, 2.26 mmol) and [Tm<sup>But</sup>]K (1.00 g, 1.94 mmol) was treated with methanol (25 mL) at -78°C and the suspension was stirred for 1.5 hours, thereby resulting in the formation of a dark olive green precipitate. The volatile components were removed at 0°C to give a brown solid that was extracted into benzene (20 mL). The volatile components were removed from the golden filtrate by lyophilization giving [Tm<sup>But</sup>]In as a pale yellow solid (395 mg, 34 % yield). Colorless crystals of composition [Tm<sup>But</sup>]In·(C<sub>6</sub>H<sub>6</sub>) suitable for X-ray diffraction were obtained from vapor diffusion of pentane into a solution in benzene. Analysis calcd. [Tm<sup>But</sup>]In(C<sub>6</sub>H<sub>6</sub>)<sub>0.5</sub>: C, 45.7%; H, 5.9%;

N, 13.3%. Found: C, 44.9%; H, 6.2%; N, 12.5%.  $^1\text{H}$  NMR ( $\text{C}_6\text{D}_6$ ): 1.58 [s, 27 H of  $\text{HB}\{\text{C}_3\text{N}_2\text{H}_2[\text{C}(\text{CH}_3)_3\text{S}]_3\}$ , 6.45 [d,  $^3J_{\text{H-H}} = 2$ , 3 H of  $\text{HB}\{\text{C}_3\text{N}_2\text{H}_2[\text{C}(\text{CH}_3)_3\text{S}]_3\}$ , 6.72 [d,  $^3J_{\text{H-H}} = 2$ , 3 H of  $\text{HB}\{\text{C}_3\text{N}_2\text{H}_2[\text{C}(\text{CH}_3)_3\text{S}]_3\}$ .  $^{13}\text{C}\{^1\text{H}\}$  NMR ( $\text{C}_6\text{D}_6$ ): 29.2 [9 C,  $\text{HB}\{\text{C}_3\text{N}_2\text{H}_2[\text{C}(\text{CH}_3)_3\text{S}]_3\}$ , 58.9 [3 C,  $\text{HB}\{\text{C}_3\text{N}_2\text{H}_2[\text{C}(\text{CH}_3)_3\text{CS}]_3\}$ , 116.1 [3 C of  $\text{HB}\{\text{C}_2\text{N}_2\text{H}_2[\text{C}(\text{CH}_3)_3\text{CS}]_3\}$ , 121.7 [3 C of  $\text{HB}\{\text{C}_2\text{N}_2\text{H}_2[\text{C}(\text{CH}_3)_3\text{S}]_3\}$ , 160.3 [3 C,  $\text{HB}\{\text{C}_2\text{N}_2\text{H}_2[\text{C}(\text{CH}_3)_3\text{CS}]_3\}$ . IR Data (KBr,  $\text{cm}^{-1}$ ): 3420 (br), 3180 (w), 3145 (w), 3033 (w), 2978 (s), 2923 (m), 2435 (br), 1567 (m), 1479 (m), 1452 (w), 1420 (s), 1397 (s), 1356 (vs), 1300 (m), 1262 (m), 1224 (m), 1198 (vs), 1170 (s), 1109 (m), 1062 (w), 1027 (w), 928 (w), 821 (m), 754 (m), 722 (m), 681 (s), 589 (w), 553 (w), 494 (w), 464 (w). FAB-MS:  $m/z = 591.9$  [ $\text{M}$ ] $^+$ ,  $\text{M} = [\text{Tm}^{\text{Bu}^t}]\text{In}$ .

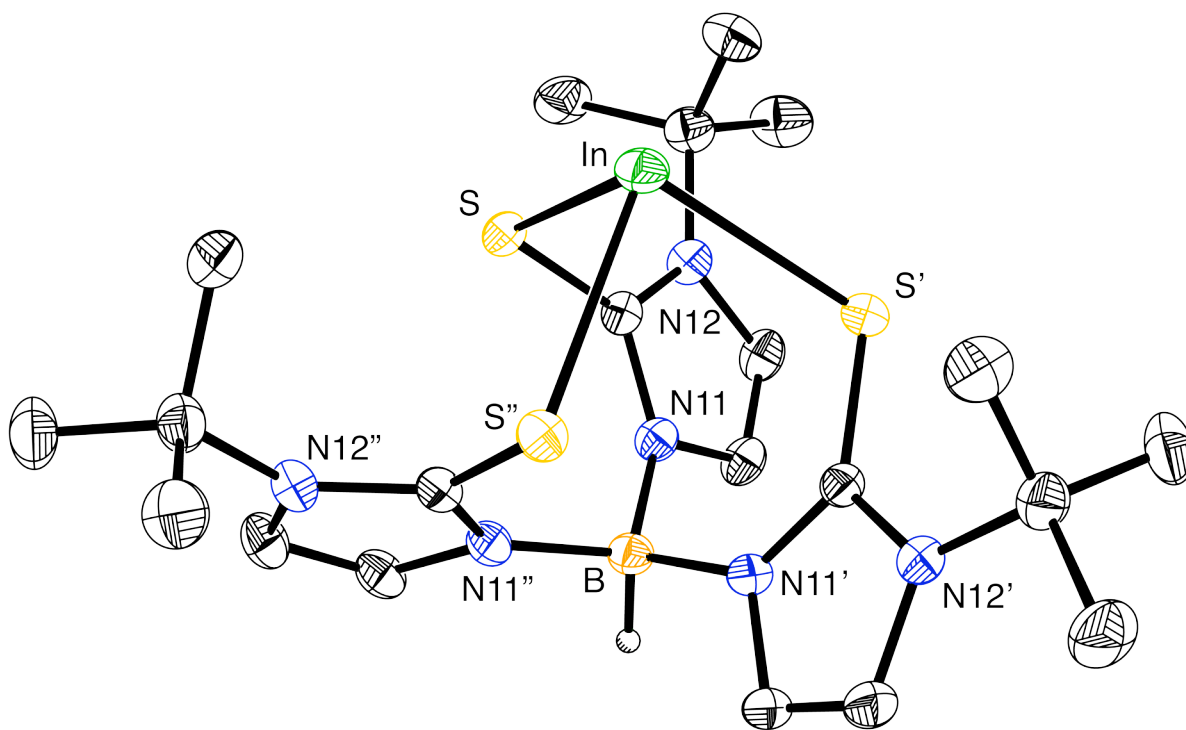

*Molecular structure of  $[\text{Tm}^{\text{Bu}^t}]\text{In}$*

### Synthesis of [Tm<sup>But</sup>]InB(C<sub>6</sub>F<sub>5</sub>)<sub>3</sub>

A mixture of [Tm<sup>But</sup>]In (50 mg, 0.084 mmol) and B(C<sub>6</sub>F<sub>5</sub>)<sub>3</sub> (44 mg, 0.086 mmol) was treated with toluene (1 mL) and the resulting yellow solution was placed at -35°C for a period of 5 days, thereby resulting in the deposition of pale yellow crystals. The crystals were washed with hexanes (2 × 0.5 mL) and dried *in vacuo* to give [Tm<sup>But</sup>]InB(C<sub>6</sub>F<sub>5</sub>)<sub>3</sub> as a pale yellow solid (45 mg, 49% yield). Crystals suitable for elemental analysis were obtained from benzene. Analysis calcd.

[Tm<sup>But</sup>]InB(C<sub>6</sub>F<sub>5</sub>)<sub>3</sub>·(C<sub>6</sub>H<sub>6</sub>): C, 45.7%; H, 3.4%; N, 7.1%. Found: C, 45.5%; H, 3.1%; N, 7.1%.

<sup>1</sup>H NMR (C<sub>6</sub>D<sub>6</sub>): 1.12 [s, 27 H of HB{C<sub>3</sub>N<sub>2</sub>H<sub>2</sub>[C(CH<sub>3</sub>)<sub>3</sub>]S<sub>3</sub>}], 6.21 [d, <sup>3</sup>J<sub>H-H</sub> = 2, 3 H of HB{C<sub>3</sub>N<sub>2</sub>H<sub>2</sub>[C(CH<sub>3</sub>)<sub>3</sub>]S<sub>3</sub>}], 6.39 [d, <sup>3</sup>J<sub>H-H</sub> = 2, 3 H of HB{C<sub>3</sub>N<sub>2</sub>H<sub>2</sub>[C(CH<sub>3</sub>)<sub>3</sub>]S<sub>3</sub>)]. <sup>13</sup>C{<sup>1</sup>H} NMR (C<sub>6</sub>D<sub>6</sub>): 28.2 [9 C, HB{C<sub>3</sub>N<sub>2</sub>H<sub>2</sub>[C(CH<sub>3</sub>)<sub>3</sub>]S<sub>3</sub>}], 60.1 [3 C, HB{C<sub>3</sub>N<sub>2</sub>H<sub>2</sub>[C(CH<sub>3</sub>)<sub>3</sub>]CS<sub>3</sub>}], 118.1 [3 C of HB{C<sub>2</sub>N<sub>2</sub>H<sub>2</sub>[C(CH<sub>3</sub>)<sub>3</sub>]CS<sub>3</sub>}], 123.0 [3 C of HB{C<sub>2</sub>N<sub>2</sub>H<sub>2</sub>[C(CH<sub>3</sub>)<sub>3</sub>]S<sub>3</sub>}], 153.8 [3 C of HB{C<sub>2</sub>N<sub>2</sub>H<sub>2</sub>[C(CH<sub>3</sub>)<sub>3</sub>]CS<sub>3</sub>}], 18 C of B(C<sub>6</sub>F<sub>5</sub>)<sub>3</sub> were not observed. <sup>19</sup>F{<sup>1</sup>H} NMR (C<sub>6</sub>D<sub>6</sub>): -166.9 [m, 6 *m*-F of B(C<sub>6</sub>F<sub>5</sub>)<sub>3</sub>], -163.4 [t, <sup>3</sup>J<sub>F-F</sub> = 20, 3 *p*-F of B(C<sub>6</sub>F<sub>5</sub>)<sub>3</sub>], -130.4 [d, <sup>3</sup>J<sub>F-F</sub> = 18, 6 *o*-F of B(C<sub>6</sub>F<sub>5</sub>)<sub>3</sub>]. IR Data (KBr, cm<sup>-1</sup>): 3448(br), 3192(w), 3152(w), 3091(w), 3071(w), 3036(w), 2982(m), 2930(w), 2668(w), 2422(br), 2299(w), 2234(w), 1963(w), 1819(w), 1642(m), 1601(w), 1566(m), 1512(vs), 1461(vs), 1422(s), 1400(m), 1361(vs), 1312(s), 1280(s), 1230(m), 1195(vs), 1177(vs), 1131(m), 1098(vs), 1033(m), 980(vs), 962(vs), 929(w), 821(m), 772(s), 730(s), 683(s), 659(s), 615(m), 588(m), 573(m), 552(m), 543(w), 519(w), 495(m), 459(w).

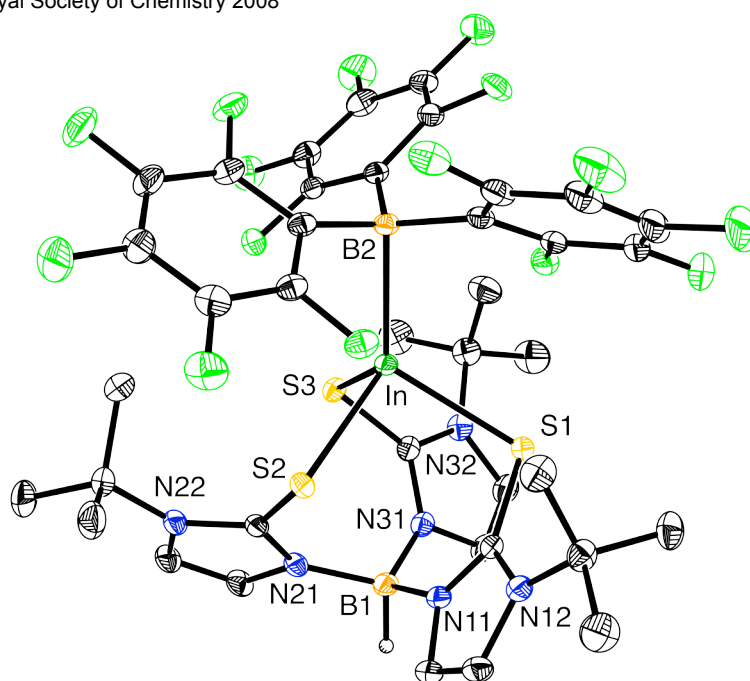

*Molecular structure of [Tm<sup>Bu<sup>t</sup></sup>]InB(C<sub>6</sub>F<sub>5</sub>)<sub>3</sub>*

### Synthesis of [Tm<sup>Bu<sup>t</sup></sup>]In( $\kappa^2$ -S<sub>4</sub>)

A mixture of [Tm<sup>Bu<sup>t</sup></sup>]In (50 mg, 0.084 mmol) and S<sub>8</sub> (11 mg, 0.043 mmol) was treated with THF (2 mL). The resulting yellow solution was stirred for 1 day, after which the volatile components were removed *in vacuo*, thereby giving a yellow solid that was extracted into acetonitrile (2 × 1 mL). The volatile components were removed from the combined extract *in vacuo* to give [Tm<sup>Bu<sup>t</sup></sup>]InS<sub>4</sub> as a pale yellow solid (27 mg, 45% yield). Colorless crystals of composition [Tm<sup>Bu<sup>t</sup></sup>]InS<sub>4</sub> suitable for X-ray diffraction were obtained from benzene. Crystals suitable for elemental analysis were obtained from THF. Analysis calcd. [Tm<sup>Bu<sup>t</sup></sup>]InS<sub>4</sub>·0.5(THF): C, 36.5%; H, 5.1%; N, 11.1%. Found: C, 37.4%; H, 5.1%; N, 11.8%. <sup>1</sup>H NMR (CD<sub>3</sub>CN): 1.71 [s, 27 H of HB{C<sub>3</sub>N<sub>2</sub>H<sub>2</sub>[C(CH<sub>3</sub>)<sub>3</sub>]S<sub>3</sub>}], 4.3 [br, 1 H of HB{C<sub>3</sub>N<sub>2</sub>H<sub>2</sub>[C(CH<sub>3</sub>)<sub>3</sub>]S<sub>3</sub>}], 6.87 [d, <sup>3</sup>J<sub>H-H</sub> = 2, 3 H of HB{C<sub>3</sub>N<sub>2</sub>H<sub>2</sub>[C(CH<sub>3</sub>)<sub>3</sub>]S<sub>3</sub>}], 7.23 [d, <sup>3</sup>J<sub>H-H</sub> = 2, 3 H of HB{C<sub>3</sub>N<sub>2</sub>H<sub>2</sub>[C(CH<sub>3</sub>)<sub>3</sub>]S<sub>3</sub>)]. <sup>13</sup>C{<sup>1</sup>H} NMR (THF-*d*<sub>8</sub>): 30.3 [9 C, HB{C<sub>3</sub>N<sub>2</sub>H<sub>2</sub>[C(CH<sub>3</sub>)<sub>3</sub>]S<sub>3</sub>}], 60.5 [3 C, HB{C<sub>3</sub>N<sub>2</sub>H<sub>2</sub>[C(CH<sub>3</sub>)<sub>3</sub>]CS<sub>3</sub>}], 119.3 [3 C of HB{C<sub>2</sub>N<sub>2</sub>H<sub>2</sub>[C(CH<sub>3</sub>)<sub>3</sub>]CS<sub>3</sub>}], 124.6 [3 C of HB{C<sub>2</sub>N<sub>2</sub>H<sub>2</sub>[C(CH<sub>3</sub>)<sub>3</sub>]S<sub>3</sub>}], 154.2 [3 C of

HB{C<sub>2</sub>N<sub>2</sub>H<sub>2</sub>[C(CH<sub>3</sub>)<sub>3</sub>]CS<sub>3</sub>}. IR Data (KBr, cm<sup>-1</sup>): 2976 (s), 2959 (s), 2885 (w), 2426 (m), 2299 (w), 2241 (w), 1567 (s), 1480 (m), 1421 (s), 1398 (s), 1359 (vs), 1308 (s), 1259 (m), 1230 (s), 1198 (vs), 1102 (m), 1073 (m), 1030 (w), 978 (w), 945 (w), 929 (w), 822 (s), 769 (s), 732 (vs), 685 (vs).

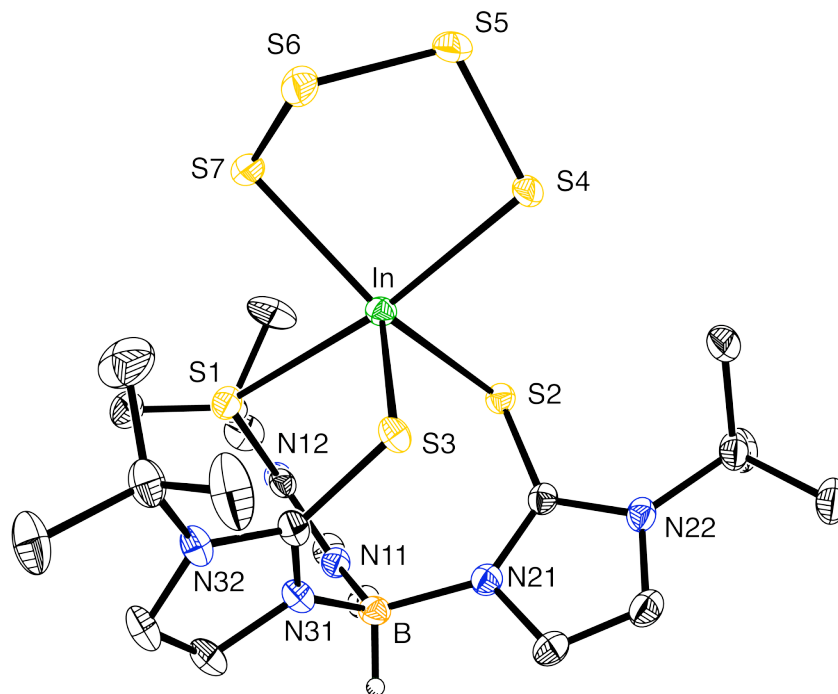

*Molecular structure of [Tm<sup>Bu<sup>t</sup></sup>]In(κ<sup>2</sup>-S<sub>4</sub>)*

### Synthesis of [(Tm<sup>Bu<sup>t</sup></sup>)<sub>2</sub>In]I

A mixture of InI<sub>3</sub> (110 mg, 0.222 mmol) and [Tm<sup>Bu<sup>t</sup></sup>]I (300 mg, 0.440 mmol) was treated with THF (3 mL), thereby resulting in the immediate deposition of a yellow precipitate. The mixture was stirred for one hour and the volatile components were removed *in vacuo*. The orange solid was extracted into CH<sub>2</sub>Cl<sub>2</sub> (5 mL) and filtered. The volatile components were removed from the filtrate *in vacuo*, giving [(Tm<sup>Bu<sup>t</sup></sup>)<sub>2</sub>In]I as a white solid (195 mg, 73% yield). Colorless crystals suitable for X-ray diffraction were obtained by vapor diffusion of Et<sub>2</sub>O into a solution of [(Tm<sup>Bu<sup>t</sup></sup>)<sub>2</sub>In]I in a mixture of benzene and CH<sub>2</sub>Cl<sub>2</sub>. Crystals suitable for elemental analysis were obtained from THF. Analysis calcd. [(Tm<sup>Bu<sup>t</sup></sup>)<sub>2</sub>In]I·2(THF): C, 44.8%; H, 6.3%; N, 12.5%. Found: C, 45.0%; H, 5.8%; N,

12.3%.  $^1\text{H}$  NMR ( $\text{CDCl}_3$ ): 1.74 [s, 54 H of  $(\text{HB}\{\text{C}_3\text{N}_2\text{H}_2[\text{C}(\text{CH}_3)_3]\text{S}\}_3)_2$ ], 4.4 [br, 2 H of  $(\text{HB}\{\text{C}_3\text{N}_2\text{H}_2[\text{C}(\text{CH}_3)_3]\text{S}\}_3)_2$ ], 6.82 [d,  $^3J_{\text{H-H}} = 2$ , 6 H of  $(\text{HB}\{\text{C}_3\text{N}_2\text{H}_2[\text{C}(\text{CH}_3)_3]\text{S}\}_3)_2$ ], 7.08 [d,  $^3J_{\text{H-H}} = 2$ , 6 H of  $(\text{HB}\{\text{C}_3\text{N}_2\text{H}_2[\text{C}(\text{CH}_3)_3]\text{S}\}_3)_2$ ].  $^{13}\text{C}$  NMR ( $\text{CDCl}_3$ ): 30.2 [q,  $^1J_{\text{C-H}} = 128$ , 18 C,  $(\text{HB}\{\text{C}_3\text{N}_2\text{H}_2[\text{C}(\text{CH}_3)_3]\text{S}\}_3)_2$ ], 60.1 [s, 6 C,  $(\text{HB}\{\text{C}_3\text{N}_2\text{H}_2[\text{C}(\text{CH}_3)_3]\text{CS}\}_3)_2$ ], 118.4 [d,  $^1J_{\text{C-H}} = 195$ , 6 C of  $(\text{HB}\{\text{C}_2\text{N}_2\text{H}_2[\text{C}(\text{CH}_3)_3]\text{CS}\}_3)_2$ ], 124.0 [d,  $^1J_{\text{C-H}} = 196$ , 6 C of  $(\text{HB}\{\text{C}_2\text{N}_2\text{H}_2[\text{C}(\text{CH}_3)_3]\text{S}\}_3)_2$ ], 153.2 [s, 6 C,  $(\text{HB}\{\text{C}_2\text{N}_2\text{H}_2[\text{C}(\text{CH}_3)_3]\text{CS}\}_3)_2$ ]. IR Data (KBr,  $\text{cm}^{-1}$ ): 3422 (br), 3141 (w), 3083 (w), 2977 (s), 2925 (m), 2421 (br), 2248 (w), 1567 (m), 1479 (m), 1458 (w), 1420 (vs), 1398 (m), 1356 (vs), 1309 (s), 1261 (m), 1228 (s), 1198 (vs), 1177 (vs), 1105 (w), 1073 (m), 1032 (w), 929 (w), 823 (m), 768 (m), 733 (s), 687 (s), 591 (m), 552 (m), 496 (m), 459 (m). FAB-MS:  $m/z = 1069.2$   $[\text{M}]^+$ ,  $\text{M} = [(\text{Tm}^{\text{Bu}^t})_2\text{In}]$ .

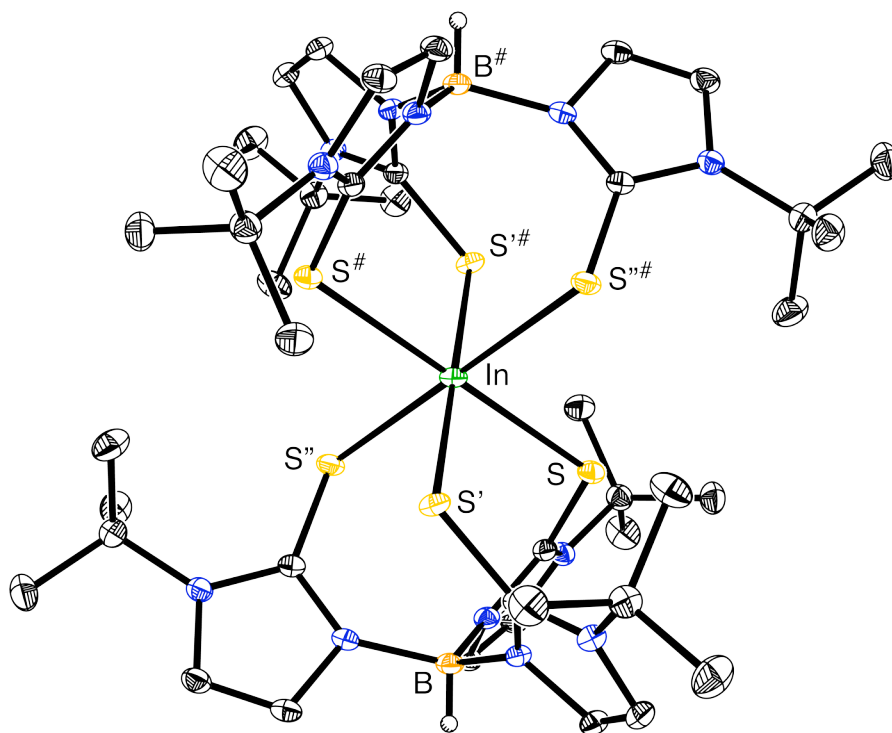

*Molecular structure of  $[(\text{Tm}^{\text{Bu}^t})_2\text{In}]$ I (only the cation is shown)*

## Synthesis of [(Tm<sup>Bu<sup>t</sup></sup>)<sub>2</sub>In]Cl

A solution of InCl<sub>3</sub> (21 mg, 0.095 mmol) in acetonitrile (2 mL) was added to a solution of [Tm<sup>Bu<sup>t</sup></sup>]K (100 mg, 0.19 mmol) in acetonitrile (1 mL) over a period of 30 minutes. The mixture was stirred for 3 hours and the volatile components were removed *in vacuo*. The white solid was washed with C<sub>6</sub>H<sub>6</sub> (2 × 1 mL) and extracted into CH<sub>3</sub>CN (2 × 1 mL). The volatile components of the extract were removed *in vacuo* giving [(Tm<sup>Bu<sup>t</sup></sup>)<sub>2</sub>In]Cl as a white solid (65 mg, 62% yield). Colorless crystals of the composition [(Tm<sup>Bu<sup>t</sup></sup>)<sub>2</sub>In]Cl suitable for X-ray diffraction were obtained from a concentrated solution in CH<sub>3</sub>CN. Crystals suitable for elemental analysis were obtained from CHCl<sub>3</sub>. Analysis calcd. [(Tm<sup>Bu<sup>t</sup></sup>)<sub>2</sub>In]Cl•2.25(CHCl<sub>3</sub>): C, 38.7%; H, 5.2%; N, 12.2%. Found: C, 38.6%; H, 5.0%; N, 12.2%. <sup>1</sup>H NMR (CDCl<sub>3</sub>): 1.74 [s, 54 H of (HB{C<sub>3</sub>N<sub>2</sub>H<sub>2</sub>[C(CH<sub>3</sub>)<sub>3</sub>]S<sub>3</sub>)<sub>2</sub>], 4.4 [br, 2 H of (HB{C<sub>3</sub>N<sub>2</sub>H<sub>2</sub>[C(CH<sub>3</sub>)<sub>3</sub>]S<sub>3</sub>)<sub>2</sub>], 6.82 [d, <sup>3</sup>J<sub>H-H</sub> = 2, 6 H of (HB{C<sub>3</sub>N<sub>2</sub>H<sub>2</sub>[C(CH<sub>3</sub>)<sub>3</sub>]S<sub>3</sub>)<sub>2</sub>], 7.10 [d, <sup>3</sup>J<sub>H-H</sub> = 2, 6 H of (HB{C<sub>3</sub>N<sub>2</sub>H<sub>2</sub>[C(CH<sub>3</sub>)<sub>3</sub>]S<sub>3</sub>)<sub>2</sub>] <sup>13</sup>C NMR (CDCl<sub>3</sub>): 29.9 [18 C, (HB{C<sub>3</sub>N<sub>2</sub>H<sub>2</sub>[C(CH<sub>3</sub>)<sub>3</sub>]S<sub>3</sub>)<sub>2</sub>], 59.9 [6 C, (HB{C<sub>3</sub>N<sub>2</sub>H<sub>2</sub>[C(CH<sub>3</sub>)<sub>3</sub>]S<sub>3</sub>)<sub>2</sub>], 118.2 [6 C of (HB{C<sub>2</sub>N<sub>2</sub>H<sub>2</sub>[C(CH<sub>3</sub>)<sub>3</sub>]CS<sub>3</sub>)<sub>2</sub>], 123.7 [6 C of (HB{C<sub>2</sub>N<sub>2</sub>H<sub>2</sub>[C(CH<sub>3</sub>)<sub>3</sub>]CS<sub>3</sub>)<sub>2</sub>], 6 C of (HB{C<sub>2</sub>N<sub>2</sub>H<sub>2</sub>[C(CH<sub>3</sub>)<sub>3</sub>]CS<sub>3</sub>)<sub>2</sub> were not observed. IR Data (KBr, cm<sup>-1</sup>): 3427 (br), 3171 (w), 3161 (w), 3142 (s), 3070 (vs), 2977 (vs), 2925 (s), 2660 (w), 2419 (s), 2298 (w), 2245 (m), 2181 (s), 1830 (w), 1765(w), 1681(w), 1644(w), 1569(vs), 1478(s), 1421(vs), 1398(vs), 1356(vs), 1310(vs), 1262 (s), 1228 (vs), 1198 (vs), 1137 (s), 1073 (s), 1031 (m), 974 (w), 927 (vs), 823 (s), 764 (vs), 731 (vs), 688 (vs). FAB-MS m/z = 1069.2 [M]<sup>+</sup>, M = [(Tm<sup>Bu<sup>t</sup></sup>)<sub>2</sub>In].



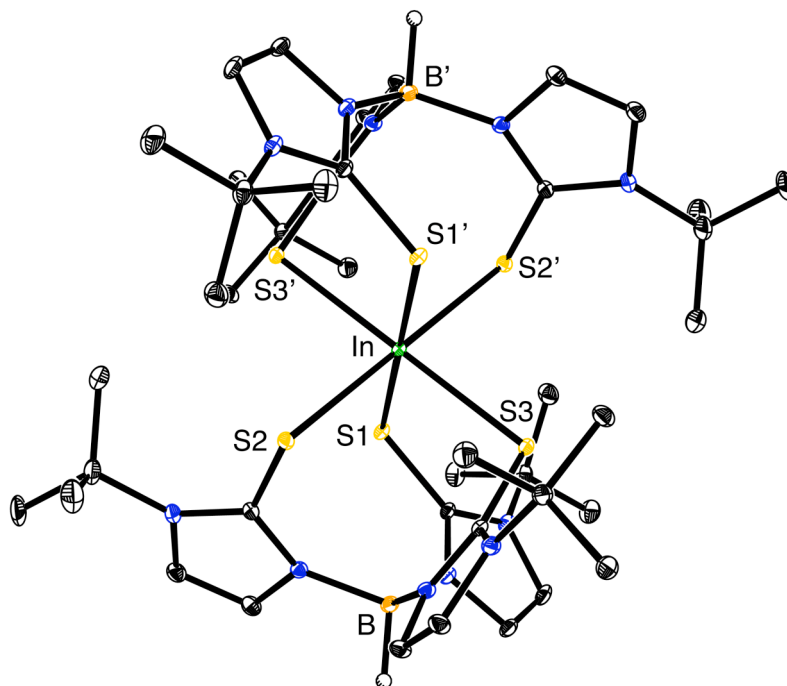

*Molecular structure of  $[(Tm^{Bu^t})_2In]Cl$  (only the cation is shown)*

### Synthesis of $[\kappa^2-Tm^{Bu^t}]_2InCl$

A solution of  $[Tm^{Bu^t}]In$  (25 mg, 0.042 mmol) in benzene (0.5 mL) was treated with pyridine-*N*-oxide (4 mg, 0.042 mmol) and heated at 80 °C for 3 days resulting in the formation of a white precipitate. The precipitate was isolated by filtration and crystallized from chloroform (0.5 mL).

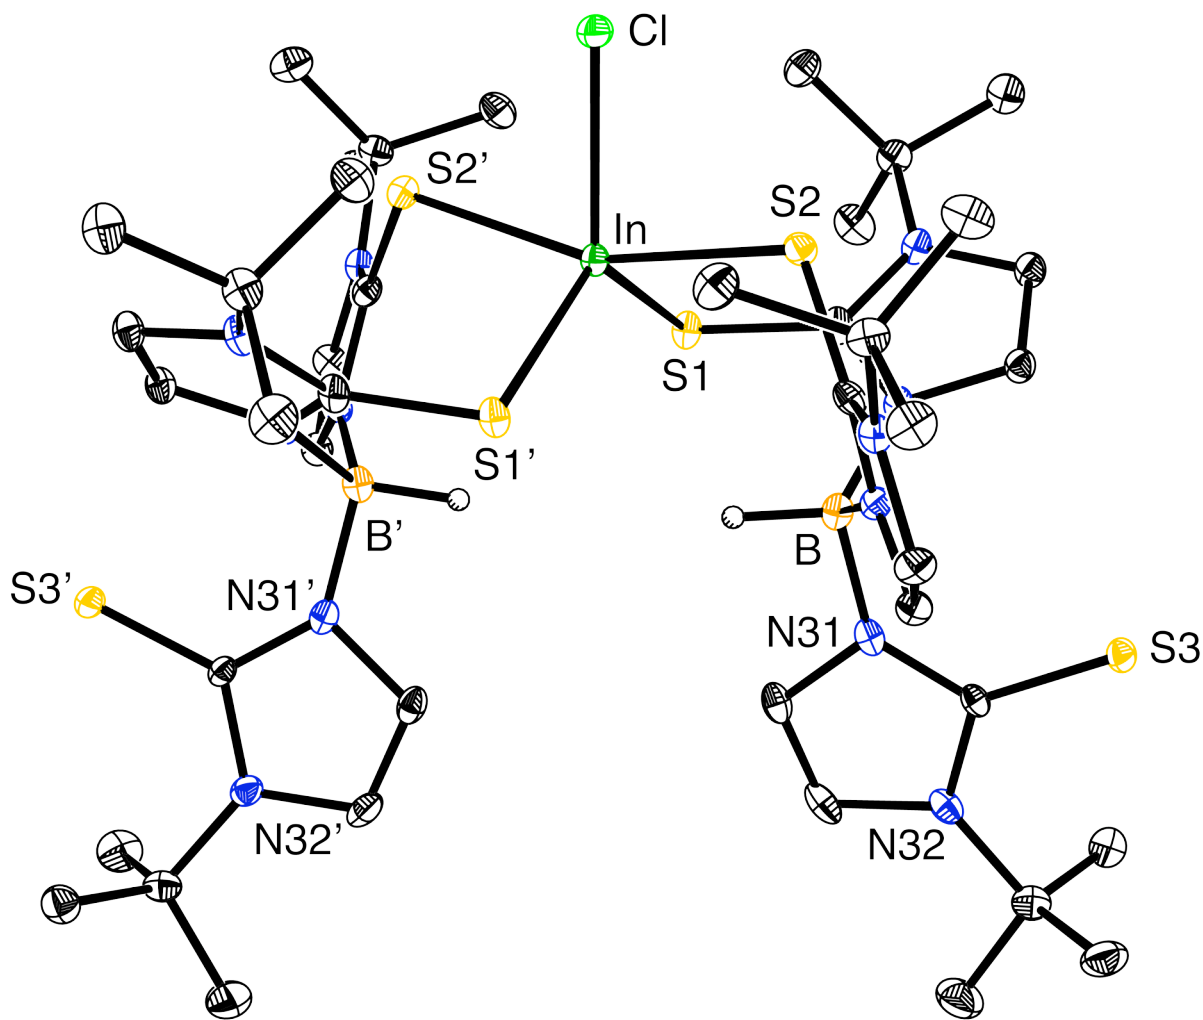

*Molecular structure of  $[\kappa^2\text{-Tm}^{\text{Bu}^t}]_2\text{InCl}$*

### Synthesis of $[\kappa^2\text{-Tm}^{\text{Bu}^t}]_2\text{InN}_3$

(a)  $[\text{Tm}^{\text{Bu}^t}]\text{In}$  (25 mg, 0.042 mmol) was treated with a cold ( $-35^\circ\text{C}$ ) solution of  $\text{Me}_3\text{SiN}_3$  (5 mg, 0.043 mmol) in chloroform (0.5 mL). The mixture was filtered and allowed to stand at room temperature for two weeks resulting in the formation of colorless crystals of  $[\kappa^2\text{-Tm}^{\text{Bu}^t}]\text{InN}_3$  (ca. 2 mg) which were isolated and structurally characterized by X-ray diffraction.

(b)  $[\text{Tm}^{\text{Bu}^t}]\text{In}$  (100 mg, 0.169 mmol) was treated with a solution of *p*-TolS(O)<sub>2</sub>N<sub>3</sub> (34 mg, 0.172 mmol) in benzene (1 mL). The golden solution was filtered and allowed to stand

at room temperature for one week resulting in the formation of colorless crystals of  $[\kappa^2\text{-Tm}^{\text{Bu}^t}]\text{InN}_3$  (ca. 10 mg) which were isolated and structurally characterized by X-ray diffraction.

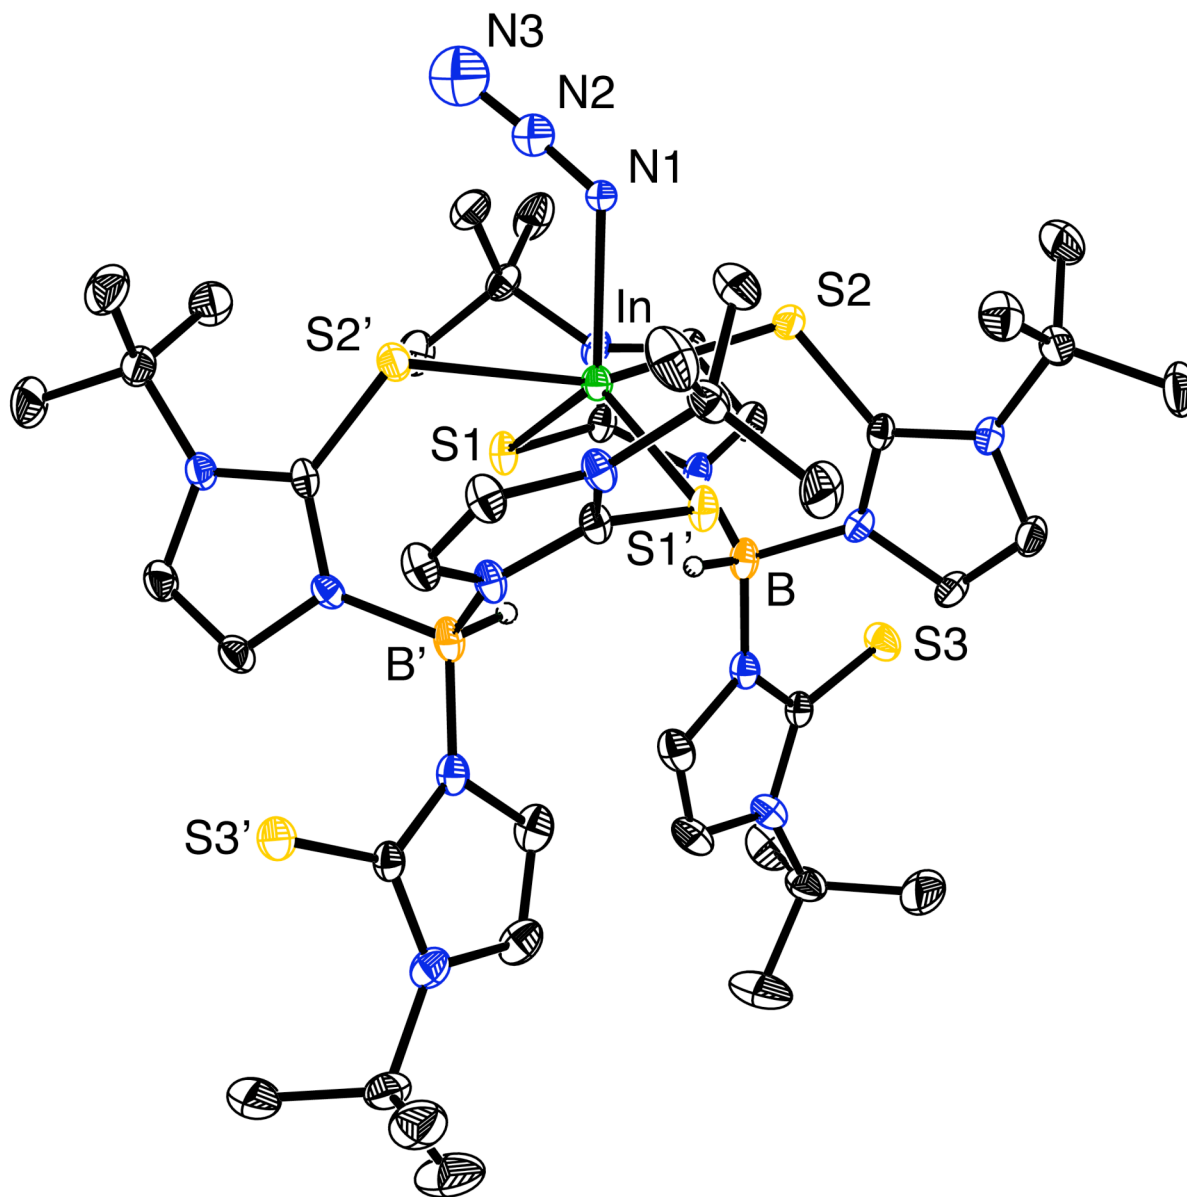

*Molecular structure of  $[\kappa^2\text{-Tm}^{\text{Bu}^t}]_2\text{InN}_3$*

**(only one disordered configuration of the azide ligand is shown)**

### **X-ray structure determinations**

X-ray diffraction data were collected on either a Bruker Apex II diffractometer or a Bruker P4 diffractometer equipped with a SMART CCD detector. Crystal data, data collection and refinement parameters are summarized in Table 1. The structures were solved using direct methods and standard difference map techniques, and were refined by full-matrix least-squares procedures on  $F^2$  with SHELXTL (Version 6.1).<sup>7</sup> For  $[\text{Tm}^{\text{But}}]\text{In}$ ,  $[\text{Tm}^{\text{But}}]\text{InB}(\text{C}_6\text{F}_5)_3$ , and  $\{[\text{Tm}^{\text{But}}]_2\text{In}\}[\text{Cl}]$ , the B–H hydrogens were restrained to 1.05 Å. The  $\kappa^2\text{-S}_4$  ligand of  $[\text{Tm}^{\text{But}}]\text{In}(\kappa^2\text{-S}_4)$  exhibits two fold disorder and were refined such that common In–S bond lengths of the disordered configurations were restrained to be the same. The  $\text{N}_3$  ligand of  $[\kappa^2\text{-Tm}^{\text{But}}]_2\text{InN}_3$  exhibits two fold disorder and were refined such that common bond lengths of the disordered configurations were restrained to be the same.

**Table 1.** Crystal, intensity collection and refinement data.

|                                          | [Tm <sup>But</sup> ]In·0.5(C <sub>6</sub> H <sub>6</sub> )       | [Tm <sup>But</sup> ]Tl·0.5(C <sub>6</sub> H <sub>6</sub> )        |
|------------------------------------------|------------------------------------------------------------------|-------------------------------------------------------------------|
| lattice                                  | Rhombohedral                                                     | Triclinic                                                         |
| formula                                  | C <sub>24</sub> H <sub>37</sub> BInN <sub>6</sub> S <sub>3</sub> | C <sub>24</sub> H <sub>37</sub> BN <sub>6</sub> S <sub>3</sub> Tl |
| formula weight                           | 631.41                                                           | 720.96                                                            |
| space group                              | <i>R</i> -3                                                      | <i>P</i> -1                                                       |
| <i>a</i> /Å                              | 13.5112(4)                                                       | 14.6625(11)                                                       |
| <i>b</i> /Å                              | 13.5112(4)                                                       | 15.6152(12)                                                       |
| <i>c</i> /Å                              | 28.6753(18)                                                      | 15.6517(11)                                                       |
| $\alpha$ /°                              | 90.00                                                            | 69.9950(10)                                                       |
| $\beta$ /°                               | 90.00                                                            | 67.7660(10)                                                       |
| $\gamma$ /°                              | 120.00                                                           | 71.1020(10)                                                       |
| <i>V</i> /Å <sup>3</sup>                 | 4533.4(3)                                                        | 3038.1(4)                                                         |
| <i>Z</i>                                 | 6                                                                | 4                                                                 |
| temperature (K)                          | 273(2)                                                           | 243(2)                                                            |
| radiation ( $\lambda$ , Å)               | 0.71073                                                          | 0.71073                                                           |
| $\rho$ (calcd.), g cm <sup>-3</sup>      | 1.388                                                            | 1.576                                                             |
| $\mu$ (Mo K $\alpha$ ), mm <sup>-1</sup> | 1.012                                                            | 5.545                                                             |
| $\theta$ max, deg.                       | 28.58                                                            | 27.10                                                             |
| no. of data                              | 2445                                                             | 12871                                                             |
| no. of parameters                        | 103                                                              | 640                                                               |
| <i>R</i> <sub>1</sub>                    | 0.0313                                                           | 0.0328                                                            |
| <i>wR</i> <sub>2</sub>                   | 0.1330                                                           | 0.0741                                                            |
| GOF                                      | 1.028                                                            | 1.065                                                             |

**Table 1 (contd).** Crystal, intensity collection and refinement data.

|                                | [Tm <sup>Bu<sup>t</sup></sup> ]In→B(C <sub>6</sub> F <sub>5</sub> ) <sub>3</sub> ·<br>2(C <sub>6</sub> H <sub>6</sub> ) | [Tm <sup>Bu<sup>t</sup></sup> ]In(κ <sup>2</sup> -S <sub>4</sub> ) |
|--------------------------------|-------------------------------------------------------------------------------------------------------------------------|--------------------------------------------------------------------|
| lattice                        | Triclinic                                                                                                               | Monoclinic                                                         |
| formula                        | C <sub>51</sub> H <sub>46</sub> B <sub>2</sub> F <sub>15</sub> InN <sub>6</sub> S <sub>3</sub>                          | C <sub>21</sub> H <sub>34</sub> BInN <sub>6</sub> S <sub>7</sub>   |
| formula weight                 | 1260.56                                                                                                                 | 720.59                                                             |
| space group                    | <i>P</i> -1                                                                                                             | <i>P</i> 2 <sub>1</sub> / <i>n</i>                                 |
| <i>a</i> /Å                    | 12.1353(6)                                                                                                              | 11.6446(6)                                                         |
| <i>b</i> /Å                    | 12.5348(6)                                                                                                              | 16.4002(9)                                                         |
| <i>c</i> /Å                    | 20.0186(10)                                                                                                             | 16.1622(9)                                                         |
| <i>α</i> /°                    | 81.989(1)                                                                                                               | 90                                                                 |
| <i>β</i> /°                    | 77.827(1)                                                                                                               | 92.026(1)                                                          |
| <i>γ</i> /°                    | 70.812(1)                                                                                                               | 90                                                                 |
| <i>V</i> /Å <sup>3</sup>       | 2803.2                                                                                                                  | 3084.6(3)                                                          |
| <i>Z</i>                       | 2                                                                                                                       | 4                                                                  |
| temperature (K)                | 243(2)                                                                                                                  | 243(2)                                                             |
| radiation (λ, Å)               | 0.71073                                                                                                                 | 0.71073                                                            |
| ρ (calcd.), g cm <sup>-3</sup> | 1.493                                                                                                                   | 1.552                                                              |
| μ (Mo Kα), mm <sup>-1</sup>    | 0.624                                                                                                                   | 1.263                                                              |
| θ max, deg.                    | 26.370                                                                                                                  | 28.330                                                             |
| no. of data                    | 11342                                                                                                                   | 7135                                                               |
| no. of parameters              | 708                                                                                                                     | 366                                                                |
| <i>R</i> <sub>1</sub>          | 0.0286                                                                                                                  | 0.0302                                                             |
| <i>wR</i> <sub>2</sub>         | 0.0938                                                                                                                  | 0.0899                                                             |
| GOF                            | 1.063                                                                                                                   | 1.026                                                              |

**Table 1 (contd).** Crystal, intensity collection and refinement data.

|                                         | $[\kappa^2\text{-Tm}^{\text{Bu}^t}]_2\text{InCl}\cdot 2(\text{C}_6\text{H}_6)$ | $[\kappa^2\text{-Tm}^{\text{Bu}^t}]_2\text{InN}_3\cdot 2(\text{C}_6\text{H}_6)$ |
|-----------------------------------------|--------------------------------------------------------------------------------|---------------------------------------------------------------------------------|
| lattice                                 | Monoclinic                                                                     | Monoclinic                                                                      |
| formula                                 | $\text{C}_{54}\text{H}_{80}\text{B}_2\text{ClInN}_{12}\text{S}_6$              | $\text{C}_{54}\text{H}_{80}\text{B}_2\text{InN}_{15}\text{S}_6$                 |
| formula weight                          | 1261.55                                                                        | 1268.13                                                                         |
| space group                             | $C2/c$                                                                         | $C2/c$                                                                          |
| $a/\text{\AA}$                          | 28.367(3)                                                                      | 28.0261(17)                                                                     |
| $b/\text{\AA}$                          | 11.6180(14)                                                                    | 12.0762(8)                                                                      |
| $c/\text{\AA}$                          | 19.433(2)                                                                      | 19.4918(12)                                                                     |
| $\alpha/^\circ$                         | 90.00                                                                          | 90.00                                                                           |
| $\beta/^\circ$                          | 103.393(2)                                                                     | 101.905(2)                                                                      |
| $\gamma/^\circ$                         | 90.00                                                                          | 90.00                                                                           |
| $V/\text{\AA}^3$                        | 6230.5(13)                                                                     | 6455.1(7)                                                                       |
| $Z$                                     | 4                                                                              | 4                                                                               |
| temperature (K)                         | 125(2)                                                                         | 243(2)                                                                          |
| radiation ( $\lambda$ , $\text{\AA}$ )  | 0.71073                                                                        | 0.71073                                                                         |
| $\rho$ (calcd.), $\text{g cm}^{-3}$     | 1.345                                                                          | 1.305                                                                           |
| $\mu$ (Mo $K\alpha$ ), $\text{mm}^{-1}$ | 0.669                                                                          | 0.607                                                                           |
| $\theta$ max, deg.                      | 30.60                                                                          | 28.27                                                                           |
| no. of data                             | 9575                                                                           | 7555                                                                            |
| no. of parameters                       | 379                                                                            | 355                                                                             |
| $R_1$                                   | 0.0514                                                                         | 0.0594                                                                          |
| $wR_2$                                  | 0.1159                                                                         | 0.0745                                                                          |
| GOF                                     | 1.051                                                                          | 1.045                                                                           |

**Table 1 (contd).** Crystal, intensity collection and refinement data.

|                                                | $\{[\text{Tm}^{\text{But}}]_2\text{In}\}[\text{Cl}] \cdot 3(\text{CH}_3\text{CN})$ | $\{[\text{Tm}^{\text{But}}]_2\text{In}\}[\text{I}] \cdot (\text{C}_6\text{H}_6)$ |
|------------------------------------------------|------------------------------------------------------------------------------------|----------------------------------------------------------------------------------|
| lattice                                        | Monoclinic                                                                         | Trigonal                                                                         |
| formula                                        | $\text{C}_{48}\text{H}_{77}\text{B}_2\text{ClInN}_{15}\text{S}_6$                  | $\text{C}_{48}\text{H}_{74}\text{B}_2\text{InN}_{12}\text{S}_6$                  |
| formula weight                                 | 1228.50                                                                            | 1274.89                                                                          |
| space group                                    | $P2_1/c$                                                                           | $P-31c$                                                                          |
| $a/\text{\AA}$                                 | 15.5243(10)                                                                        | 11.8575(14)                                                                      |
| $b/\text{\AA}$                                 | 15.9024(10)                                                                        | 11.8575(14)                                                                      |
| $c/\text{\AA}$                                 | 25.6301(16)                                                                        | 26.003(6)                                                                        |
| $\alpha/^\circ$                                | 90                                                                                 | 90                                                                               |
| $\beta/^\circ$                                 | 102.280(1)                                                                         | 90                                                                               |
| $\gamma/^\circ$                                | 90                                                                                 | 120                                                                              |
| $V/\text{\AA}^3$                               | 6182.6(7)                                                                          | 3166.2(9)                                                                        |
| Z                                              | 4                                                                                  | 2                                                                                |
| temperature (K)                                | 125(2)                                                                             | 243(2)                                                                           |
| radiation ( $\lambda$ , $\text{\AA}$ )         | 0.71073                                                                            | 0.71073                                                                          |
| $\rho$ (calcd.), $\text{g cm}^{-3}$            | 1.320                                                                              | 1.337                                                                            |
| $\mu$ (Mo $\text{K}\alpha$ ), $\text{mm}^{-1}$ | 0.673                                                                              | 1.099                                                                            |
| $\theta$ max, deg.                             | 32.470                                                                             | 28.270                                                                           |
| no. of data                                    | 21156                                                                              | 2518                                                                             |
| no. of parameters                              | 670                                                                                | 101                                                                              |
| $R_1$                                          | 0.0365                                                                             | 0.0399                                                                           |
| $wR_2$                                         | 0.1698                                                                             | 0.1037                                                                           |
| GOF                                            | 1.056                                                                              | 1.012                                                                            |



## Computational Details

All calculations were carried out using DFT as implemented in the Jaguar 7.0 suite of *ab initio* quantum chemistry programs.<sup>8</sup> Geometry optimizations were performed with the B3LYP density functional<sup>9</sup> and LACVP\*\* basis sets, *i.e.* 6-31G\*\* (C, H, B, N, F, S) and LAV3P (In) basis sets.<sup>10</sup> Cartesian coordinates for geometry optimized structures are listed in Table 2. The energies of the optimized structures were reevaluated by additional single point calculations on each optimized geometry using cc-pVTZ(-f) correlation consistent triple- $\zeta$  (C, H, B, N, F, S) and LAV3P (In) basis sets. Molecular orbital analyses were performed with the aid of Jimp 2,<sup>11</sup> which employs Fenske-Hall calculations<sup>12</sup> and visualization using MOPLLOT.<sup>13</sup>

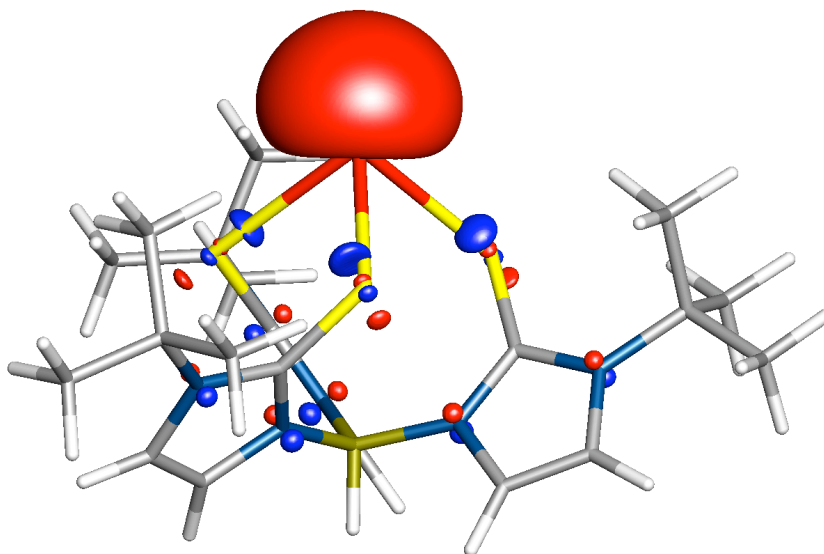

*HOMO of [Tm<sup>Bu<sup>t</sup>]</sup>*In

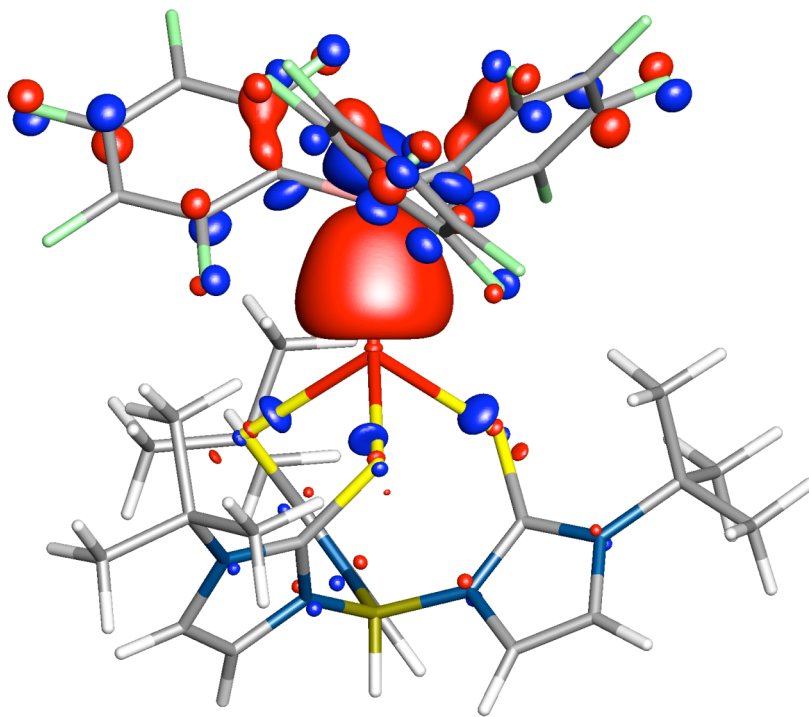

*HOMO of [Tm<sup>Bu<sup>t</sup>]</sup>InB(C<sub>6</sub>F<sub>5</sub>)<sub>3</sub>*

**Table 2.** Cartesian Coordinated for Geometry Optimized Structures (energies in parentheses are for the higher basis set)

| <b>[Tm<sup>Bu<sup>t</sup></sup>]In</b> |              |              |              |
|----------------------------------------|--------------|--------------|--------------|
| <b>-2370.73465521007 Hartrees</b>      |              |              |              |
| <b>(-2371.17590165816 Hartrees)</b>    |              |              |              |
| <b>atom</b>                            | <b>x</b>     | <b>y</b>     | <b>z</b>     |
| H1                                     | -5.308058171 | 1.010970376  | -2.042480459 |
| H2                                     | 3.529555113  | 4.091428033  | -2.042480459 |
| H3                                     | 1.778503057  | -5.102398408 | -2.042480459 |
| In4                                    | 0            | 0            | -2.236282594 |
| H5                                     | -3.538636975 | 1.029758025  | -1.903637773 |
| H6                                     | 2.661115097  | 2.549670503  | -1.903637773 |
| H7                                     | 0.877521878  | -3.579428528 | -1.903637773 |
| C8                                     | 1.653132451  | -4.192838659 | -1.44590153  |
| C9                                     | -4.457671018 | 0.664764631  | -1.44590153  |
| C10                                    | 2.804538567  | 3.528074028  | -1.44590153  |
| H11                                    | 2.596221644  | -3.637399429 | -1.460967452 |
| H12                                    | -4.448191132 | -0.429694183 | -1.460967452 |
| H13                                    | 1.851969487  | 4.067093613  | -1.460967452 |
| H14                                    | 5.40914897   | 3.157911772  | -0.536051141 |
| H15                                    | -5.439406302 | 3.105504535  | -0.536051141 |
| H16                                    | 0.030257332  | -6.263416307 | -0.536051141 |
| H17                                    | 2.44567628   | -6.381279723 | -0.073040289 |
| H18                                    | -6.749188489 | 1.072622074  | -0.073040289 |

|     |              |              |              |
|-----|--------------|--------------|--------------|
| H19 | 4.303512209  | 5.308657649  | -0.073040289 |
| H20 | 4.551388157  | 1.617576504  | -0.32664241  |
| H21 | -3.676556424 | 3.132829514  | -0.32664241  |
| H22 | -0.874831733 | -4.750406018 | -0.32664241  |
| C23 | -0.051138966 | -5.349724391 | 0.061821182  |
| C24 | 4.658566709  | 2.630574552  | 0.061821182  |
| C25 | -4.607427743 | 2.71914984   | 0.061821182  |
| C26 | 1.281279414  | -4.580194482 | -0.002352689 |
| C27 | -4.607204483 | 1.18047672   | -0.002352689 |
| C28 | 3.325925069  | 3.399717763  | -0.002352689 |
| S29 | -1.379191426 | 1.824443082  | -0.52725592  |
| S30 | 2.26960977   | 0.28219327   | -0.52725592  |
| S31 | -0.890418344 | -2.106636352 | -0.52725592  |
| C32 | 3.556390304  | 4.816140939  | 0.554916178  |
| C33 | 2.392705249  | -5.487994818 | 0.554916178  |
| C34 | -5.949095553 | 0.67185388   | 0.554916178  |
| H35 | 2.648017083  | 5.425636289  | 0.52443518   |
| H36 | -6.0227474   | -0.419568081 | 0.52443518   |
| H37 | 3.374730317  | -5.006068208 | 0.52443518   |
| H38 | 5.020011451  | 2.576537991  | 1.09431963   |
| H39 | -4.74135308  | 3.059188448  | 1.09431963   |
| H40 | -0.278658371 | -5.635726439 | 1.09431963   |
| H41 | 3.945700093  | 4.802039526  | 1.577803601  |

|     |              |              |             |
|-----|--------------|--------------|-------------|
| H42 | -6.131538266 | 1.016056753  | 1.577803601 |
| H43 | 2.185838173  | -5.818096279 | 1.577803601 |
| N44 | -3.484052947 | 0.642558023  | 0.844163686 |
| N45 | 1.185554903  | -3.338557372 | 0.844163686 |
| N46 | 2.298498045  | 2.695999349  | 0.844163686 |
| C47 | 0.324284161  | -2.273938593 | 0.685988092 |
| C48 | 1.807146508  | 1.417807618  | 0.685988092 |
| C49 | -2.131430669 | 0.856130975  | 0.685988092 |
| C50 | -3.671741919 | -0.177545554 | 1.952100887 |
| C51 | 1.682112     | 3.268594555  | 1.952100887 |
| C52 | 1.989629919  | -3.091049001 | 1.952100887 |
| N53 | -1.49740387  | 0.180367262  | 1.685816859 |
| N54 | 0.904904566  | 1.20660616   | 1.685816859 |
| N55 | 0.592499304  | -1.386973422 | 1.685816859 |
| H56 | -4.64264475  | -0.491066434 | 2.288131056 |
| H57 | 2.746598382  | -3.775115077 | 2.288131056 |
| H58 | 1.896046368  | 4.266181512  | 2.288131056 |
| B59 | 0            | 0            | 2.083367    |
| C60 | 0.834175443  | 2.349360468  | 2.462277044 |
| C61 | -2.45169357  | -0.452263109 | 2.462277044 |
| C62 | 1.617518126  | -1.897097359 | 2.462277044 |
| H63 | 0.180016409  | 2.406775648  | 3.316834881 |
| H64 | -2.174337056 | -1.047489041 | 3.316834881 |

|     |             |              |             |
|-----|-------------|--------------|-------------|
| H65 | 1.994320648 | -1.359286607 | 3.316834881 |
| H66 | 0           | 0            | 3.292104611 |

**[Tm<sup>Bu<sup>t</sup></sup>]In→B(C<sub>6</sub>F<sub>5</sub>)<sub>3</sub>**  
**-4578.973543465780 Hartrees**  
**(-4580.23867095914 Hartrees)**

| <b>atom</b> | <b>x</b>     | <b>y</b>     | <b>z</b>     |
|-------------|--------------|--------------|--------------|
| H1          | 2.53287774   | 0.808289165  | -6.667780576 |
| H2          | 4.144369979  | 0.565337104  | -5.996352277 |
| H3          | 2.931848432  | -0.744046057 | -5.935372508 |
| C4          | 3.083977547  | 0.336326876  | -5.850531834 |
| H5          | 2.2737166    | 2.877336857  | -5.35323168  |
| H6          | 0.529468894  | 0.956399902  | -5.313637754 |
| F7          | -4.023123696 | 2.886754226  | -3.848919796 |
| H8          | 4.633356031  | -1.008314602 | -4.501672056 |
| F9          | -2.550845637 | 5.094690247  | -3.185608037 |
| H10         | 3.851190559  | 2.638000761  | -4.580067093 |
| C11         | 2.536797991  | 0.8981861    | -4.526375719 |
| H12         | 0.889247413  | -0.531078229 | -4.41921981  |
| C13         | 2.781497154  | 2.417488471  | -4.499861356 |
| C14         | 1.040944512  | 0.551693586  | -4.434613242 |
| C15         | 4.307783873  | -0.664054932 | -3.537779631 |
| C16         | -3.170958988 | 2.836257716  | -2.813724344 |
| C17         | -2.430980752 | 3.963438046  | -2.47742697  |

|     |              |              |              |
|-----|--------------|--------------|--------------|
| H18 | 2.395612067  | 2.871828486  | -3.586885834 |
| N19 | 3.282387578  | 0.257931759  | -3.37567177  |
| H20 | 0.579514054  | 0.97630542   | -3.545119876 |
| F21 | -1.66772095  | -3.196801523 | -3.750433305 |
| F22 | -3.824903885 | 0.640793631  | -2.443696995 |
| C23 | 4.760705273  | -0.990364998 | -2.306289993 |
| H24 | 5.546739234  | -1.665817268 | -2.010805591 |
| C25 | -3.037528407 | 1.668049854  | -2.064300833 |
| F26 | -0.868112174 | -0.968321933 | -2.508963425 |
| C27 | -1.561755235 | 3.899483829  | -1.394015517 |
| F28 | -0.829833978 | 4.971477056  | -1.051462616 |
| C29 | -2.299178715 | -2.804630336 | -2.632443433 |
| C30 | 3.114646137  | 0.47914834   | -2.031961644 |
| F31 | -3.748982057 | -4.676411494 | -2.745815306 |
| C32 | -1.916579803 | -1.649003508 | -1.965147012 |
| N33 | 4.027887068  | -0.282938134 | -1.370724082 |
| H34 | 1.472416859  | -4.94005708  | -0.730591297 |
| C35 | -3.352435943 | -3.557810137 | -2.124477633 |
| C36 | -2.171102473 | 1.541624277  | -0.971107344 |
| C37 | -1.464314295 | 2.712822285  | -0.681125469 |
| S38 | 1.555290978  | -2.270864147 | -0.758178467 |
| S39 | 1.973584685  | 1.560564255  | -1.29815364  |
| H40 | 2.797992503  | -5.942741973 | -0.100861106 |

|      |              |              |              |
|------|--------------|--------------|--------------|
| H41  | 1.112283499  | -6.41435037  | 0.181541271  |
| C42  | 1.792868626  | -5.560614293 | 0.106655678  |
| C43  | -2.503006904 | -1.169320731 | -0.789538461 |
| C44  | -3.98426051  | -3.130821973 | -0.962576579 |
| H45  | 5.580130857  | -0.600988065 | 0.164243461  |
| F46  | -0.578152501 | 2.714370258  | 0.355310989  |
| B47  | -1.99176522  | 0.197377689  | -0.076589531 |
| B48  | 4.381194261  | -0.474036243 | 0.138191322  |
| In49 | 0.371185762  | -0.055896534 | 0.040278864  |
| C50  | 2.731218278  | -2.567199904 | 0.48262442   |
| C51  | -3.562542281 | -1.961904364 | -0.330123369 |
| H52  | 5.873036792  | 1.790425014  | 0.347808188  |
| N53  | 3.82118162   | -1.797279019 | 0.748198404  |
| H54  | -0.023708567 | -3.613365848 | 0.972827842  |
| F55  | -5.009623372 | -3.839775519 | -0.466442251 |
| F56  | -3.902319339 | 2.213739119  | 1.104144091  |
| C57  | 1.771857826  | -4.781190271 | 1.433820403  |
| N58  | 2.751444343  | -3.631004341 | 1.348123985  |
| C59  | 4.992886837  | 1.832922686  | 0.968480672  |
| N60  | 4.090023219  | 0.786417416  | 1.013294296  |
| H61  | -0.311402997 | -5.091679734 | 1.90149879   |
| C62  | 0.369006091  | -4.244893038 | 1.76729308   |
| F63  | -4.263400372 | -1.611683481 | 0.767869124  |



|     |              |              |             |
|-----|--------------|--------------|-------------|
| C64 | 4.51987819   | -2.380886529 | 1.789128405 |
| C65 | -2.443782188 | 0.356487113  | 1.475057104 |
| H66 | 3.196346371  | -6.167139995 | 2.3850528   |
| C67 | 3.868647086  | -3.505347751 | 2.162736687 |
| H68 | 1.490838322  | -6.549744023 | 2.611531391 |
| C69 | -3.330303606 | 1.331164804  | 1.948713648 |
| C70 | 2.209942921  | -5.728108171 | 2.565099323 |
| C71 | 4.556703109  | 2.807392282  | 1.798123984 |
| H72 | 5.426448098  | -1.942603228 | 2.173371982 |
| H73 | 1.218378556  | 3.967448465  | 1.881053059 |
| H74 | 4.994597175  | 3.761599392  | 2.024569432 |
| C75 | 3.089588453  | 1.122296757  | 1.872532671 |
| H76 | 0.381353305  | -3.665672351 | 2.694747037 |
| H77 | 4.112627967  | -4.216732369 | 2.929568072 |
| S78 | 1.730129454  | 0.125841145  | 2.289962793 |
| N79 | 3.370532394  | 2.369403688  | 2.370869011 |
| F80 | -1.102292865 | -1.498440223 | 2.137982217 |
| H81 | 0.591734575  | 2.542198911  | 2.723268169 |
| C82 | -1.982092627 | -0.51044442  | 2.47021681  |
| H83 | 2.205781321  | -5.234945941 | 3.541909477 |
| C84 | 1.172256034  | 3.454416149  | 2.845612963 |
| H85 | 3.344932284  | 5.118784833  | 2.714402667 |
| C86 | -3.700667483 | 1.454162407  | 3.287223514 |

|      |              |              |             |
|------|--------------|--------------|-------------|
| F87  | -4.554607519 | 2.415094265  | 3.671207073 |
| H88  | 0.647240358  | 4.103442851  | 3.553532547 |
| C89  | 2.583449289  | 3.167929276  | 3.386856339 |
| C90  | 3.293888993  | 4.512341638  | 3.623865808 |
| C91  | -2.321431653 | -0.431710123 | 3.814318575 |
| H92  | 4.301495345  | 4.386974616  | 4.032701878 |
| C93  | -3.196577989 | 0.566193826  | 4.230154908 |
| H94  | 2.711619848  | 5.074173399  | 4.358427777 |
| H95  | 2.037851859  | 1.433388819  | 4.608054591 |
| C96  | 2.546895547  | 2.391626064  | 4.71533386  |
| F97  | -1.815961465 | -1.298820285 | 4.70578042  |
| H98  | 3.561796323  | 2.213273342  | 5.086220729 |
| H99  | 2.009966524  | 2.983992985  | 5.46252826  |
| F100 | -3.545408422 | 0.669474163  | 5.519544765 |

**[Tm<sup>Bu<sup>t</sup>]\kappa^2-S<sub>4</sub>)</sup>**  
**-3963.55052675350 Hartrees**  
**(-3964.14759426603 Hartrees)**

| <b>atom</b> | <b>x</b>    | <b>y</b>     | <b>z</b>     |
|-------------|-------------|--------------|--------------|
| S1          | 0.073553164 | -0.67940328  | -5.521058974 |
| S2          | 1.829234422 | -1.585313772 | -4.85700298  |
| S3          | 2.478632588 | -0.300434581 | -3.311287081 |

|      |              |              |              |
|------|--------------|--------------|--------------|
| S4   | -1.214635698 | -0.81253117  | -3.835198515 |
| H5   | -0.899945433 | 4.79905835   | -3.018525764 |
| H6   | -0.202632103 | 3.238565008  | -2.563849999 |
| H7   | -0.907702553 | 4.010814354  | -2.259485506 |
| H8   | -1.911387316 | 3.576625919  | -2.225555556 |
| H9   | -4.08643417  | -3.660321872 | -1.702774348 |
| H10  | -2.880798215 | -2.366450834 | -1.730439617 |
| H11  | 0.968624855  | 5.983686254  | -1.64144264  |
| ln12 | 0.331665026  | -0.307336052 | -1.941794109 |
| H13  | -1.411891312 | 6.518355142  | -1.384448604 |
| H14  | 4.968863195  | -3.068641954 | -1.036791959 |
| C15  | -3.318346413 | -3.150275428 | -1.113115388 |
| H16  | -2.538927499 | -3.877713103 | -0.865225632 |
| H17  | 3.33639997   | -2.417862343 | -1.258605295 |
| H18  | 1.634961623  | 4.428222445  | -1.121953869 |
| C19  | -0.535611175 | 4.624051428  | -0.897443303 |
| C20  | 0.894394609  | 5.193146583  | -0.888416066 |
| H21  | 4.679015701  | -1.3233431   | -0.924993157 |
| H22  | -2.559798368 | 5.433041442  | -0.602739709 |
| C23  | 4.260546136  | -2.306975079 | -0.695052411 |
| C24  | -1.51852613  | 5.769176817  | -0.596062485 |
| H25  | -5.844496467 | -2.026263737 | -0.721096963 |
| S26  | -2.132218063 | 0.057536225  | -0.725980349 |

|     |              |              |              |
|-----|--------------|--------------|--------------|
| H27 | -4.659424949 | -0.709284354 | -0.704942011 |
| S28 | 1.256650929  | 1.820749063  | -0.783534404 |
| C29 | -5.052541565 | -1.550597643 | -0.134364256 |
| H30 | -5.375642258 | -4.192328555 | 0.312887373  |
| H31 | 1.130407368  | 5.628739887  | 0.088176057  |
| C32 | -3.958628203 | -2.590025636 | 0.169221189  |
| H33 | -1.303701514 | 6.263929113  | 0.356418181  |
| S34 | 0.855616837  | -2.139182102 | -0.146179162 |
| H35 | 4.181639151  | -4.62407374  | 0.861033589  |
| N36 | -0.663713494 | 3.572121013  | 0.182731301  |
| H37 | 2.52299649   | -4.036669621 | 0.673043918  |
| C38 | 0.010735959  | 2.382806967  | 0.286289073  |
| C39 | -4.597673573 | -3.7561182   | 0.944434041  |
| C40 | 4.046238516  | -2.469262398 | 0.81720415   |
| H41 | 6.069824185  | -3.089051677 | 1.150116821  |
| H42 | -3.877574869 | -4.548994651 | 1.168923862  |
| C43 | 3.472670407  | -3.85206303  | 1.175378904  |
| H44 | -5.494328151 | -1.174128534 | 0.79448692   |
| C45 | -2.09104754  | -0.881016636 | 0.722488098  |
| N46 | -2.889950791 | -1.95616446  | 1.028932793  |
| H47 | 5.875045117  | -1.345294963 | 1.299825794  |
| C48 | 5.403879934  | -2.307210043 | 1.523786785  |
| C49 | 1.774218162  | -1.220993076 | 1.010649489  |

|     |              |              |             |
|-----|--------------|--------------|-------------|
| C50 | -1.538104713 | 3.666090379  | 1.256060005 |
| H51 | -2.184543839 | 4.510294619  | 1.408330093 |
| N52 | 3.099747715  | -1.39830908  | 1.322388824 |
| H53 | -5.074777859 | -3.427849803 | 1.873459961 |
| H54 | 3.326150002  | -3.943426026 | 2.256897103 |
| N55 | -0.427871305 | 1.751565763  | 1.405402483 |
| N56 | -1.264010337 | -0.672505591 | 1.785572627 |
| H57 | 5.329068919  | -2.430408024 | 2.608912193 |
| C58 | -1.387189277 | 2.547679211  | 2.00222736  |
| N59 | 1.299033912  | -0.203564499 | 1.780721467 |
| C60 | -2.535653907 | -2.417481885 | 2.290468128 |
| B61 | -0.136871791 | 0.359822274  | 2.053017594 |
| C62 | 3.446325012  | -0.455708304 | 2.280216699 |
| H63 | -3.019757735 | -3.252723147 | 2.761684196 |
| H64 | 4.43678653   | -0.379242836 | 2.688779021 |
| C65 | -1.540279802 | -1.626128923 | 2.749624089 |
| C66 | 2.340134811  | 0.271868578  | 2.55617378  |
| H67 | -1.882255728 | 2.245960887  | 2.91065732  |
| H68 | -0.164419378 | 0.56026512   | 3.241826001 |
| H69 | 2.199396698  | 1.085659347  | 3.248383721 |
| H70 | -1.005323188 | -1.652743718 | 3.684890386 |

**[(Tm<sup>Bu<sup>t</sup></sup>)<sub>2</sub>In]<sup>+</sup>**  
**-4739.42022427666 Hartrees**  
**(-4740.29201588321 Hartrees)**

| <b>atom</b> | <b>x</b>     | <b>y</b>     | <b>z</b>     |
|-------------|--------------|--------------|--------------|
| H1          | 0.679549276  | -3.947265925 | -6.220034361 |
| H2          | 2.102455262  | -2.971900181 | -5.819175686 |
| H3          | -2.496907939 | 3.737783947  | -5.917467625 |
| H4          | -3.370069998 | 2.248285671  | -5.564644966 |
| C5          | 1.408596149  | -3.726007421 | -5.435696838 |
| H6          | 1.96906446   | -4.644810292 | -5.246663549 |
| C7          | -3.071083611 | 3.215205704  | -5.14817884  |
| H8          | -0.847628339 | -2.36686655  | -5.433342043 |
| H9          | -3.965143711 | 3.812920654  | -4.946388923 |
| H10         | 0.404818805  | -1.186197784 | -5.01864592  |
| H11         | -0.421014134 | 2.746372617  | -5.126323918 |
| C12         | -0.197902078 | -2.008426383 | -4.628108428 |
| H13         | -1.222272269 | 1.242826928  | -4.633698974 |
| H14         | -4.824376515 | 2.073037171  | -3.872879235 |
| H15         | -1.270706334 | 5.007978243  | -4.192336474 |
| C16         | 0.662919768  | -3.200424489 | -4.190025124 |
| C17         | -0.93357225  | 2.243886569  | -4.299676734 |
| H18         | -1.006138074 | -4.577380294 | -4.318411491 |
| C19         | -2.173295202 | 3.063448125  | -3.907105169 |
| H20         | -0.82544112  | -1.627690635 | -3.82422469  |
| C21         | -0.246338262 | -4.287876944 | -3.585936079 |
| C22         | -1.798868305 | 4.468304589  | -3.400145481 |

|     |              |              |              |
|-----|--------------|--------------|--------------|
| H23 | 2.670462083  | -4.800598829 | -3.253618704 |
| H24 | -2.697408439 | 5.038305599  | -3.142034457 |
| H25 | 0.314142727  | -5.186347941 | -3.310838646 |
| C26 | -4.272330831 | 1.954089677  | -2.959146147 |
| H27 | -0.234569768 | 2.14163144   | -3.471419749 |
| N28 | 1.708902358  | -2.861897054 | -3.145151696 |
| C29 | 2.65101949   | -3.825117852 | -2.801151378 |
| N30 | -2.945681615 | 2.34155257   | -2.824695708 |
| H31 | 4.171535077  | 4.897940795  | -2.321506335 |
| H32 | 5.258265218  | 2.942360171  | -2.384437805 |
| H33 | -0.752745604 | -3.908501943 | -2.694029384 |
| H34 | -1.149973494 | 4.421038274  | -2.524754464 |
| H35 | 5.338367872  | 0.2142793    | -2.445752259 |
| C36 | 1.948019271  | -1.744982507 | -2.383245332 |
| S37 | 1.078385318  | -0.243446023 | -2.380171436 |
| C38 | -4.672894883 | 1.449987093  | -1.770833356 |
| C39 | 3.465789368  | -3.289933576 | -1.867570044 |
| H40 | -5.631215436 | 1.059645403  | -1.46951399  |
| C41 | 4.709878547  | 2.227264697  | -1.799959162 |
| C42 | 4.749006891  | 0.87665795   | -1.833092754 |
| H43 | 1.803147047  | 4.262808696  | -1.652208383 |
| H44 | -3.406665484 | -3.557130044 | -1.74154747  |
| C45 | 4.43241006   | 4.959439874  | -1.260522325 |

|      |              |              |              |
|------|--------------|--------------|--------------|
| H46  | 4.322803529  | -3.710859953 | -1.367473195 |
| N47  | 3.040050532  | -1.998886802 | -1.612367854 |
| H48  | 5.502791482  | 4.766755177  | -1.140400228 |
| H49  | 4.248629487  | 5.987746841  | -0.938882073 |
| H50  | -3.860814267 | -5.231599401 | -1.380436638 |
| C51  | -2.543126867 | 2.049496229  | -1.543673154 |
| H52  | -5.054863617 | -3.935203452 | -1.198827411 |
| C53  | -3.996811681 | -4.189001845 | -1.076528831 |
| H54  | 5.012045035  | -1.48262846  | -0.801350718 |
| S55  | -2.075946483 | -1.353499638 | -0.981406523 |
| N56  | -3.609826999 | 1.519099982  | -0.887510714 |
| N57  | 3.800090743  | 2.596168626  | -0.818390536 |
| N58  | 3.872980358  | 0.390378537  | -0.878459539 |
| C59  | 2.090412478  | 4.404576719  | -0.606155934 |
| H60  | 1.950855689  | 5.460545038  | -0.352990533 |
| C61  | 3.565850434  | 4.029024031  | -0.393058374 |
| B62  | 3.872417329  | -1.145656336 | -0.604749598 |
| S63  | -0.972942135 | 2.334492985  | -0.861682252 |
| C64  | 3.276292834  | 1.450565217  | -0.269424911 |
| H65  | 1.424024643  | 3.808874791  | 0.015373859  |
| H66  | -1.424024643 | -3.808874791 | -0.015373859 |
| In67 | 0            | 0            | 0            |
| C68  | -3.276292834 | -1.450565217 | 0.269424911  |



|     |              |              |             |
|-----|--------------|--------------|-------------|
| C69 | -3.565850434 | -4.029024031 | 0.393058374 |
| H70 | -1.950855689 | -5.460545038 | 0.352990533 |
| B71 | -3.872417329 | 1.145656336  | 0.604749598 |
| C72 | -2.090412478 | -4.404576719 | 0.606155934 |
| H73 | -5.012045035 | 1.48262846   | 0.801350718 |
| S74 | 0.972942135  | -2.334492985 | 0.861682252 |
| N75 | -3.800090743 | -2.596168626 | 0.818390536 |
| H76 | -4.248629487 | -5.987746841 | 0.938882073 |
| C77 | 3.996811681  | 4.189001845  | 1.076528831 |
| N78 | -3.872980358 | -0.390378537 | 0.878459539 |
| H79 | 5.054863617  | 3.935203452  | 1.198827411 |
| H80 | -5.502791482 | -4.766755177 | 1.140400228 |
| N81 | 3.609826999  | -1.519099982 | 0.887510714 |
| H82 | 3.860814267  | 5.231599401  | 1.380436638 |
| S83 | 2.075946483  | 1.353499638  | 0.981406523 |
| C84 | -4.43241006  | -4.959439874 | 1.260522325 |
| H85 | -4.322803529 | 3.710859953  | 1.367473195 |
| H86 | 3.406665484  | 3.557130044  | 1.74154747  |
| C87 | 2.543126867  | -2.049496229 | 1.543673154 |
| H88 | -1.803147047 | -4.262808696 | 1.652208383 |
| H89 | 5.631215436  | -1.059645403 | 1.46951399  |
| C90 | -4.709878547 | -2.227264697 | 1.799959162 |
| N91 | -3.040050532 | 1.998886802  | 1.612367854 |

|      |              |              |             |
|------|--------------|--------------|-------------|
| C92  | -4.749006891 | -0.87665795  | 1.833092754 |
| C93  | -3.465789368 | 3.289933576  | 1.867570044 |
| C94  | 4.672894883  | -1.449987093 | 1.770833356 |
| H95  | -4.171535077 | -4.897940795 | 2.321506335 |
| H96  | -5.258265218 | -2.942360171 | 2.384437805 |
| H97  | -5.338367872 | -0.2142793   | 2.445752259 |
| H98  | 1.149973494  | -4.421038274 | 2.524754464 |
| C99  | -1.948019271 | 1.744982507  | 2.383245332 |
| H100 | 0.752745604  | 3.908501943  | 2.694029384 |
| S101 | -1.078385318 | 0.243446023  | 2.380171436 |
| C102 | -2.65101949  | 3.825117852  | 2.801151378 |
| N103 | 2.945681615  | -2.34155257  | 2.824695708 |
| H104 | 2.697408439  | -5.038305599 | 3.142034457 |
| H105 | -0.314142727 | 5.186347941  | 3.310838646 |
| H106 | -2.670462083 | 4.800598829  | 3.253618704 |
| C107 | 4.272330831  | -1.954089677 | 2.959146147 |
| N108 | -1.708902358 | 2.861897054  | 3.145151696 |
| C109 | 1.798868305  | -4.468304589 | 3.400145481 |
| H110 | 0.234569768  | -2.14163144  | 3.471419749 |
| C111 | 0.246338262  | 4.287876944  | 3.585936079 |
| H112 | 0.82544112   | 1.627690635  | 3.82422469  |
| H113 | 1.270706334  | -5.007978243 | 4.192336474 |
| H114 | 1.006138074  | 4.577380294  | 4.318411491 |

|      |              |              |             |
|------|--------------|--------------|-------------|
| H115 | 4.824376515  | -2.073037171 | 3.872879235 |
| C116 | 2.173295202  | -3.063448125 | 3.907105169 |
| C117 | -0.662919768 | 3.200424489  | 4.190025124 |
| C118 | 0.93357225   | -2.243886569 | 4.299676734 |
| C119 | 0.197902078  | 2.008426383  | 4.628108428 |
| H120 | 1.222272269  | -1.242826928 | 4.633698974 |
| H121 | 3.965143711  | -3.812920654 | 4.946388923 |
| H122 | 0.421014134  | -2.746372617 | 5.126323918 |
| H123 | -0.404818805 | 1.186197784  | 5.01864592  |
| C124 | 3.071083611  | -3.215205704 | 5.14817884  |
| H125 | -1.96906446  | 4.644810292  | 5.246663549 |
| H126 | 0.847628339  | 2.36686655   | 5.433342043 |
| C127 | -1.408596149 | 3.726007421  | 5.435696838 |
| H128 | 3.370069998  | -2.248285671 | 5.564644966 |
| H129 | 2.496907939  | -3.737783947 | 5.917467625 |
| H130 | -2.102455262 | 2.971900181  | 5.819175686 |
| H131 | -0.679549276 | 3.947265925  | 6.220034361 |

**B(C<sub>6</sub>F<sub>5</sub>)<sub>3</sub>**  
**-2208.20580842365 Hartrees**  
**(-2209.03200680080 Hartrees)**

| <b>atom</b> | <b>x</b>     | <b>y</b>    | <b>z</b>     |
|-------------|--------------|-------------|--------------|
| F1          | -4.667014074 | 0.973049528 | -1.449470961 |

|     |              |              |              |
|-----|--------------|--------------|--------------|
| F2  | 1.540646197  | -4.513576254 | -1.446508355 |
| F3  | 3.146295088  | 3.543858352  | -1.491612816 |
| F4  | -2.044590845 | 1.51673557   | -1.453569601 |
| F5  | 2.29779394   | 1.000220678  | -1.497058472 |
| F6  | -0.270507459 | -2.536123493 | -1.458345114 |
| C7  | -3.830220993 | 0.204585735  | -0.745582401 |
| C8  | 2.075263011  | 3.200508048  | -0.769557168 |
| C9  | 1.764575002  | -3.405164599 | -0.734238722 |
| C10 | -2.465637843 | 0.469484442  | -0.725373391 |
| F11 | -5.630167149 | -1.139233192 | -0.01982969  |
| F12 | 3.832941517  | -4.267851583 | 0.008832604  |
| C13 | 1.619696344  | 1.88712791   | -0.749391621 |
| C14 | 0.83853556   | -2.36822751  | -0.718736317 |
| F15 | 1.830812432  | 5.426821087  | -0.022826983 |
| C16 | 2.939244017  | -3.280623037 | 0.005369741  |
| C17 | -4.324786231 | -0.876882189 | -0.019167665 |
| C18 | 1.402110731  | 4.166035004  | -0.023348749 |
| C19 | 0.490125513  | 1.479855781  | -0.022490775 |
| C20 | -1.543318545 | -0.317673559 | -0.017102728 |
| C21 | 1.036838925  | -1.176765959 | -0.004200316 |
| C22 | 3.177396935  | -2.121698186 | 0.741562575  |
| C23 | 0.27933791   | 3.810577543  | 0.721787644  |
| C24 | -3.45138267  | -1.683242072 | 0.708153164  |

|     |              |              |             |
|-----|--------------|--------------|-------------|
| B25 | -0.007460002 | -0.007409466 | -0.01542383 |
| C26 | -0.159414725 | 2.491384109  | 0.701865469 |
| C27 | 2.238251316  | -1.097031085 | 0.717473528 |
| C28 | -2.090383281 | -1.400003645 | 0.689861673 |
| C29 | 4.299673812  | -2.005957286 | 1.458017842 |
| F30 | -0.361363331 | 4.735149491  | 1.443722917 |
| F31 | -3.92755748  | -2.715084362 | 1.411335421 |
| F32 | -1.238579241 | 2.202157978  | 1.44816506  |
| F33 | 2.513575762  | -0.008156267 | 1.454938344 |
| F34 | -1.296645946 | -2.201589521 | 1.419102855 |

- (1) (a) McNally, J. P.; Leong, V. S.; Cooper, N. J. in *Experimental Organometallic Chemistry*, Wayda, A. L.; Darensbourg, M. Y., Eds.; American Chemical Society: Washington, DC, 1987; Chapter 2, pp 6-23.  
(b) Burger, B.J.; Bercaw, J. E. in *Experimental Organometallic Chemistry*; Wayda, A. L.; Darensbourg, M. Y., Eds.; American Chemical Society: Washington, DC, 1987; Chapter 4, pp 79-98.  
(c) Shriver, D. F.; Drezdson, M. A.; *The Manipulation of Air-Sensitive Compounds*, 2<sup>nd</sup> Edition; Wiley-Interscience: New York, 1986.
- (2) Gottlieb, H. E.; Kotlyar, V.; Nudelman, A. J. *Org. Chem.* **1997**, *62*, 7512-7515.
- (3) "CIL NMR Solvent Data Chart", Cambridge Isotope Laboratories, Inc., Andover, MA 01810-5413, USA.
- (4) Claude H. Dungan and John R. Van Wazer, "Compilation of reported F NMR chemical shifts, 1951 to mid-1967", New York, Wiley-Interscience (1970).

- (5) (a) Tesmer, M.; Shu, M.; Vahrenkamp, H. *Inorg. Chem.* **2001**, *40*, 4022-4029.  
(b) Singh, A. K.; Mehtab, S.; Singh, U. P.; Aggarwal, V. *Anal. Bioanal. Chem.* **2007**, *388*, 1867-1876.
- (6) Mihalcik, D. J.; White, J. L.; Tanski, J. M.; Zakharov, L. N.; Yap, G. P. A.; Incarvito, C. D.; Rheingold, A. L.; Rabinovich, D. *Dalton Trans.* **2004**, 1626-1634.
- (7) (a) Sheldrick, G. M. SHELXTL, An Integrated System for Solving, Refining and Displaying Crystal Structures from Diffraction Data; University of Göttingen, Göttingen, Federal Republic of Germany, 1981.  
(b) Sheldrick, G. M. *Acta Cryst.* **2008**, *A64*, 112-122.
- (8) Jaguar 6.5, Schrödinger, LLC, Portland, Oregon.
- (9) (a) Becke, A. D. *J. Chem. Phys.* **1993**, *98*, 5648-5652.  
(b) Becke, A. D. *Phys. Rev. A* **1988**, *38*, 3098-3100.  
(c) Lee, C. T.; Yang, W. T.; Parr, R. G. *Phys. Rev. B* **1988**, *37*, 785-789.  
(d) Vosko, S. H.; Wilk, L.; Nusair, M. *Can. J. Phys.* **1980**, *58*, 1200-1211.  
(e) Slater, J. C. *Quantum Theory of Molecules and Solids, Vol. 4: The Self-Consistent Field for Molecules and Solids*; McGraw-Hill: New York, 1974.
- (10) (a) Hay, P. J.; Wadt, W. R. *J. Chem. Phys.* **1985**, *82*, 270-283.  
(b) Wadt, W. R.; Hay, P. J. *J. Chem. Phys.* **1985**, *82*, 284-298.  
(c) Hay, P. J.; Wadt, W. R. *J. Chem. Phys.* **1985**, *82*, 299-310.
- (11) Manson, J. M. B.; Webster, C. E.; Hall, M. B. Jimp 2 Version 0.089 (2006); Department of Chemistry, Texas A&M University, College Station, TX 77842, (<http://www.chem.tamu.edu/jimp2/>).
- (12) Hall, M. B.; Fenske, R. F. *Inorg. Chem.* **1972**, *11*, 768-775.
- (13) Version 2.0, June 1993; Lichtenberger, D. L. Department of Chemistry, University of Arizona, Tuscon, AZ 85721.
